# Supplementary material for: Enhanced electrochemical properties of a natural graphite anode using a promising crosslinked ionomer binder in Li-ion batteries
Source: Royal Society of Chemistry journal article supplement (doi:10.1039/c7nj00868f), 2017-01-01
Supplement: c7nj00868f1.pdf [file c7nj00868f1.pdf]

Supplementary material for

**Enhanced Electrochemical Properties of Natural Graphite Anode Using  
Promising Cross-linked Ionomer Binder in Li-ion Batteries**

Shu Huang<sup>a</sup>, Jianguo Ren<sup>b</sup>, Rong Liu<sup>a</sup>, Min Yue<sup>b</sup>, Youyuan Huang<sup>b</sup> and Guohui  
Yuan<sup>a\*</sup>

<sup>a</sup> School of Chemistry and Chemical Engineering, Harbin Institute of Technology,  
Harbin, 150001, P. R. China

<sup>b</sup> Shenzhen BTR New Energy Materials Inc., Shenzhen, 518000, P. R. China

\* Corresponding author. Harbin Institute of Technology, Harbin, 150001, P. R. China

Tel/Fax numbers: 86- 0451-86418616

E-mail addresses: yghhit@163.com (Guohui Yuan).

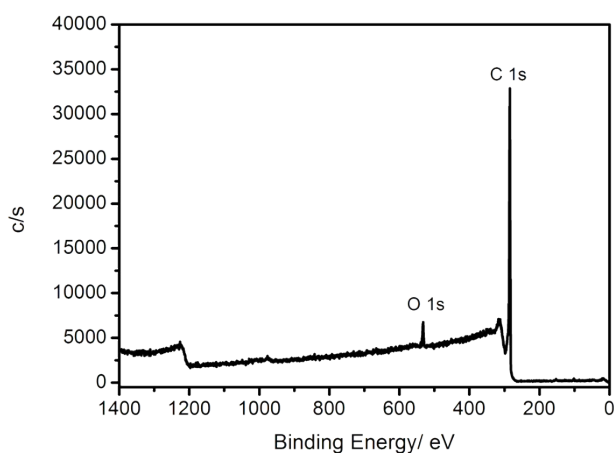

Fig.S1 XPS spectra of graphite material particles. The average content of oxygen on the surface of  
graphite particles is 4.1%. XPS was conducted on PHI 1800 (Japan).

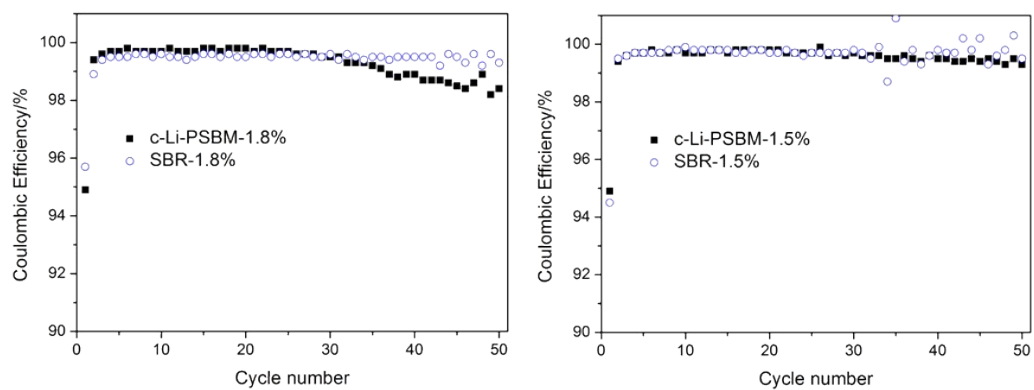

Fig.S2 Coulombic Efficiency curves of graphite electrodes with different binder using addition amount of 1.8% and 1.5%, respectively, upon cycling.

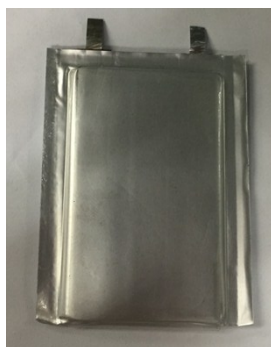

Fig.S3 Soft-package Li-ion batteries tested in this paper.
